# Supplementary figures and images for: Different Angiogenic Potentials of Mesenchymal Stem Cells Derived from Umbilical Artery, Umbilical Vein, and Wharton’s Jelly
Source: Hindawi journal article supplement (doi:10.1155/2017/3175748), 2017-01-01

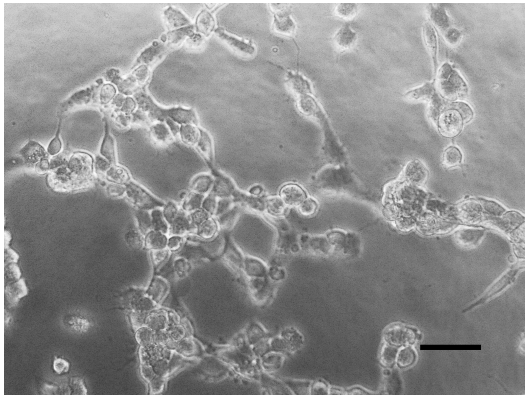

Supplement: f1 [file 3175748.f1.ai]
